# Supplementary material for: Numerical and biomass growth study of Bulimulus bonariensis (Rafinesque, 1833) (Gastropoda: Bulimulidae) under laboratory conditions
Source: PeerJ journal article supplement (doi:10.7717/peerj.16803), 2024-01-25
Supplement: Certificado_CICUAE_Stella_Maris_Martn.pdf [file Certificado_CICUAE_Stella_Maris_Martn.pdf]

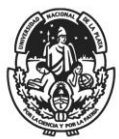

La Plata, 16 de junio de 2023

Se deja constancia que el COMITÉ INSTITUCIONAL PARA EL CUIDADO Y USO DE ANIMALES DE ESTUDIO (CICUAE) de la Facultad de Ciencias Naturales y Museo de la Universidad Nacional de La Plata, evaluó el protocolo presentado por la **Dra. Stella Maris Martín**, titulado **Crecimiento numérico y en biomasa de *Bulimulus bonariensis* (Rafinesque, 1833)**.

Este comité considera que el mencionado protocolo se ajusta al reglamento del CICUAE y por lo tanto lo considera **APROBADO**.

Número de protocolo: **009.06.2023**.

**Dr. Diego Montalti**  
CICUAE

**Dra. Sandra Torrusio**  
Secretaría de Investigación y Transferencia  
Fac. Ciencias Naturales y Museo  
UNLP
