# Supplementary material for: Numerical and biomass growth study of Bulimulus bonariensis (Rafinesque, 1833) (Gastropoda: Bulimulidae) under laboratory conditions
Source: PeerJ. 2024 Jan 25;12:e16803. doi: 10.7717/peerj.16803 (PMC10822139; doi:10.7717/peerj.16803)
Supplement: Supplemental Information 1 [file peerj-12-16803-s001.xlsx]

## Sheet: Hoja1
Clutch /Group 1	7/XI/2017	16/XI/2017	24/XI/2017	5/XII/2017	28/XII/2017	11/I/2018	25/I/2018	7/II/2018	20/II/2018	5/III/2018	20/III/2018	2/IV/2018	16/IV/2018	30/IV/2018	15/V/2018	28/V/2018	11/VI/2018	25/VI/2018	9/VII/2018	24/VII/2018	7/VIII/2018	20/VIII/2018	3/IX/2018	17/IX/2018	1/X/2018	15/X/2018	30/X/2018	5/XI/2018	19/XI/2018	3/XII/2018	17/XII/2018	2/I/2019	14/I/2019	28/I/2019	11/II/2019	26/II/2019	11/III/2019	1/IV/2019	17/IV/2019	29/IV/2019
	1708	1708	1952	1952	2806	2.44	3294	9.74	10.83	6.44	6.54	7.03	8.13	8.21	8.88	9.26	10.1	10.36	11	11.56	12.42	13.96	14.54	15.8	16.68	17.47	18.52	19.26	20.12	20.5	20.96	21.3	20.6	20.6	20.65	20.65	20.66	20.7	20.7	20.73
	1708	1708	1952	1952	3.66	3.05	5368	5.72	7.95	11.41	11.65	7.5	8.14	8.55	9	9.47	10.42	11.2	11.8	12.54	13.59	14.75	15.23	15.95	16.9	17.65	18.7	19.54	20.29	20.6	20.64	20.65	20.4	20.46	20.55	20.55	20.58	20.61	20.61	20.64
	1708	1952	1952	2074	3782	4148	5612	5.92	6.4	6.65	6.99	8.48	9.12	9.2	9.76	10.25	10.84	11.23	12	12.59	14.8	15.89	16.09	16.98	17.96	18.42	19.1	19.89	20.3	20.5	20.86	21
	1.83	2074	2074	2074	4.27	4392	5734	7.27	6.36	8.15	8.38	11.64	12.28	12.7	13	13.6	14	14.42	14.5
	1.83	2074	2318	2.44	4392	4514	6344	6.38	7.16	7.04
	1952	2074	2.44	2562	4514	4.88	9.15
	1952	2318	2.44	2684	5124	5.49
	2074	2318	2562	2684	2318	2684
	2196	2562	2684	2806	2.44
	2196	2562	3.05	3.05	2684
	2196	2562	6.1
	2318	2562	6588
	2318	2684
	2318	2684
	2.44	2806
	2.44
	2.44
modal length	2095	2310	2342	2427	3599	3949	5917	7006	7.74	7938	8.39	8662	9417	9665	10.16	10645	11.34	11802	12325	12.23	13603	14866	15286	16243	17.18	17846	18773	19.56	20.23	20.53	20.82	20.98	20.5	20.53	20.6	20.6	20.62	20655	20655	20685
Clutch /Group 2	7/XI/2017	16/XI/2017	24/XI/2017	5/XII/2017	28/XII/2017	11/I/2018	25/I/2018	7/II/2018	20/II/2018	5/III/2018	20/III/2018	2/IV/2018	16/IV/2018	30/IV/2018	15/V/2018	28/V/2018	11/VI/2018	25/VI/2018	9/VII/2018	24/VII/2018	7/VIII/2018	20/VIII/2018	3/IX/2018	17/IX/2018	1/X/2018	15/X/2018	30/X/2018	5/XI/2018	19/XI/2018	3/XII/2018	17/XII/2018	2/I/2019	14/I/2019	28/I/2019	11/II/2019	26/II/2019	11/III/2019	1/IV/2019	17/IV/2019	29/IV/2019	13/V/2019	27/V/2019	10/VI/2019
		1708	1.83	1.83	2074	2318	2196	2074	2.44	2.97	3	4.62	6.89	7.29	7.14	10.93	10.52	10.93	11.26	12.29	12.85	13.28	14.04	14.82	15.61	16.41	17.23	17.82	18.21	17.35	18.1	18.3	19.02	19.76	19.76	19.83	20.13	20.15	20.18	20.23	20.02	20.15	20.2
		1.83	1.83	1.83	2074	2.44	2806	3782	4026	4.3	4.32	6.54	9.86	10.09	10.02	10.74	7.3	10.67	10.72	10.79	11.26	12.29	13.23	14	14.65	15.2	16	16.77	17	17.65	18.36	18.38	18.88	19.6	19.68	19.77	19.94	20.09	20.14	20.17	19.98	20.11
		1.83	1952	1952	2074	2684	3.66	5368	4.88	5.86	5.86	9.56	10.54	10.68	10.75	7.28	10.93	7.38	7.65	7.85	8.9	9	10.06	11.21	12.36	13.8	14.21	15.78	16.69
		1.83	1952	2074	2074	2806	5124	8.27	8.51	9.29	9.19	10.15	10.79	11.01	10.68	9.94	11.73	11.82	12.11	12.98
		1952	1952	2074	2196	3.05	6.71	9.12	9.12	9.48	9.72	10.52	6.32
		1952	1952	2074	2196	3294	7198	9.6	9.61	9.84	10.01	5.49
		1952	1952	2074	2196	3416	7564	9.89	9.8	9.98
		1952	1952	2196	2318	4514	9394
		1952	1952	2196	2318	4514	3.05
		2074	2074	2196	2318	5.49
		2074	2074	2196	2562	5.49
		2074	2074	2196	3.05	5978
		2196	2196	2684	3416
		2.44	2318	2684	3904
		2684	2684	2806	4026
		2684	2684	2806	4148
		2806	2684	3.05	4758
		2928	2806	3294	2.20
		3294	3.05
		3416
modal length		2281	2209	2345	2772	3833	5300	6872	6912	7389	7017	7813	8880	9768	9648	9723	10120	10200	10435	10978	11003	11523	12443	13343	14207	15137	15813	16790	17.3	17.5	18.23	18.34	18.95	19.68	19.72	19.8	20035	20.12	20.16	20.2	20	20.13	20.2
Clutch /Group 3	7/XI/2017	16/XI/2017	24/XI/2017	5/XII/2017	28/XII/2017	11/I/2018	25/I/2018	7/II/2018	20/II/2018	5/III/2018	20/III/2018	2/IV/2018	16/IV/2018	30/IV/2018	15/V/2018	28/V/2018	11/VI/2018	25/VI/2018	9/VII/2018	24/VII/2018	7/VIII/2018	20/VIII/2018	3/IX/2018	17/IX/2018	1/X/2018	15/X/2018	30/X/2018	5/XI/2018	19/XI/2018	3/XII/2018	17/XII/2018	2/I/2019	14/I/2019	28/I/2019	11/II/2019	26/II/2019	11/III/2019	1/IV/2019	17/IV/2019	29/IV/2019	13/V/2019	27/V/2019	10/VI/2019	24/VI/2019	8/VII/2019	22/VII/2019	5/VIII/2019	19/VIII/2019	2/IX/2019
			1708	1464	1464	4148	3538	1952	1.9	2.22	8.34	10.93	8.93	8.98	7.05	8.96	7.08	7.03	9.6	10.88	10.23	11.5	11.7	11.9	12.2	12.4	12.6	12.75	12.98	14.09	14.28	15.2	16.1	16.9	17.2	17.83	18.42	18.44	18.8	19	18.95	19.2	19.28	19.36	19.34	19.34	19.6	19.56	19.7
			1708	1586	1586	2318	2196	2074	2.3	2.49	3.51	9	11.4	6.7	11.72	12.05	4	4.16	7.7	8.9	9.37	10.5	11.34	11.58	11.6	12.32	12.38	12.56	12.64	13.89	14.18	15.16	15.9	16.54	16.8	17.21	17.9	18.04	18.7	18.9	19.05	19.18	19.18	19.24	19.22	19.3	19.4
			1.83	1.83	1708	2806	6.1	2074	2.4	2.98	3.52	7.13	7.64	3.88	7.91	7.27	11.71	11.72	12.58	9.69	12.56
			1.83	1.83	1708	4514	5734	2196	2.6	3.25	3.01	5.76	3.34	2.57	4.07	8.06	7.88	7.87	8.52
			1586	1708	1708	2196	3.05	2684	2.7	3.49	9.73	3.53	2.7	7.7
			1708	2074	1708	1952	2806	2806	2.7	3.57	5.34	3.14	6.37	11.71
			1708	1708	1.83	2.44	2074	3.05	3.6	3.66	5.57	2.65	6.19
			1708	1708	1.83	1.83	3.05	4026	4.2	5.24	4.72
			1708	1.83	1952	2806	3904	4148	4.3	5.35
			1708	1586	1952	1.83	2928	4392	7.82	5.85
			1464	1.83	2074	2562	3782	7.11	9.37	7.98
			1708	2.44	2074	1708	2318	8.19	2	9.6
			1.83	1.83	2074	2806	2562
			1.83	1.83	2196	1.83	2806
			1708	2074	2196	2684	2196
			1952	1708	2318	2.44
			1.83	1708	2318	1952
			1.83	1.83	2562	1952
			2074	1708	2928	1708
			2196	1.83	3.66
			2196	2196	1.59
			2.44	1708	1.71
			1708	1708	1.71
			1.83	1586	1.71
			1464	1.83	1.59
			1586	1.83	1.83
			1.83	1708	1.83
			1.83	1.59	1.95
			1804	1803	1991	2446	3.27	3725	3824	4.64	5468	6.02	6.73	6923	7688	9085	7668	7695	9.6	9823	10.72	11	11.52	11.74	11.9	12.36	12.49	12655	12810	13.99	14.23	15.18	16	16.72	17	17.52	18.16	18.24	18.75	18.95	19	19190	19.23	19.3	19.28	19.32	19.5	19.56	19.7
Clutch /Group 4	7/XI/2017	16/XI/2017	24/XI/2017	5/XII/2017	28/XII/2017	11/I/2018	25/I/2018	7/II/2018	20/II/2018	5/III/2018	20/III/2018	2/IV/2018	16/IV/2018	30/IV/2018	15/V/2018	28/V/2018	11/VI/2018	25/VI/2018	9/VII/2018	24/VII/2018	7/VIII/2018	20/VIII/2018	3/IX/2018	17/IX/2018	1/X/2018	15/X/2018	30/X/2018	5/XI/2018	19/XI/2018	3/XII/2018	17/XII/2018	2/I/2019	14/I/2019	28/I/2019	11/II/2019	26/II/2019	11/III/2019	1/IV/2019	17/IV/2019	29/IV/2019	13/V/2019	27/V/2019	10/VI/2019	24/VI/2019	8/VII/2019	22/VII/2019	5/VIII/2019	19/VIII/2019
				1464	1708	5124	4.27	1.83	2806	6.39	6.66	5.95	9.16	9	9.19	4.22	9.03	6.31	7.5	8.02	9.88	10.26	11.08	11.54	12.1	12.42	12.61	13.6	13.7	14.25	14.8	15.01	15.5	15.76	16.24	16.32	16.92	17.16	17.44	17.89	18.92	18.66	18.7	18.5	18.65	18.74	18.8	19
				1.83	2562	2684	1.83	2562	3.05	9.25	5.52	3.72	9.49	9.38	6.26	6.85	5.94	6.57	7.6	8.53	9.4	10.49	11.29	12.16	12.23	12.78	12.9	13.68	14.1	14.8	15.1	15.22	15.46	15.66	15.86	16.12	16.76	16.98	17.26	17.76	17.86	18.45	18.5
				1.83	1952	2.44	1952	3176	4.1	4.66	9.25	8.82	6.83	6.27	5.69	7.13	7.07	7.11	8.2	8.84	9.5	11.05	12	12.07	12.57	12.87	13.2	13.4	13.6	14	14.51	14.79	15.3	15.53	15.91	16.25	16.72	16.88	17.2	17.75	17.88
				1.83	2806	3.05	2.44	3.66	4148	5.33	3.12	5.14	5.58	6.76	6.54	6.48	6.55	8.98	9.5	10.05	10.02
				2074	2684	3.66	2074	5.08	4.88	2.94	6	6.71	6.06	5.94	3.85	9.2
				1708	1708	3294	7.32	5.43	5368	8.75	6.6	9.26	6.56	6.53	7.11	5.8
				1952	1708	1.83	1708	5.58	5.49	3.57	9.09	6.58	3.99	4.23	5.63	9.65
				1952	2928	1708	5002	5.87	8.73	6.28	4.04	5.44	5.26	5.6
				1952	2806	1708	5368	8.02	9.39	5.93	4.95
				1.83	2806	4026	6954	8.75
				2318	1952	2318	5002
				1708	1952	2196	3782
				1.83	1952	1586	2318
				1708	1.83	1952	2562
				1.83	1952	1.83
				2.44	1708	2074
				1586	2318	1952
				1708	1.83
				2196	1464
				1.83	1586
				1708	1952
				1708	1586
				1.83	1708
				1952
				2806
				1708
				1.83
				1.83
				1.83
				1889	2063	2555	3756	4996	5329	5.9	6137	6453	6616	6714	6324	7047	7148	7243	8.2	8.86	9.7	10.6	11457	11923	12.3	12.69	12903	13.56	13.8	14.35	14803	15007	15.42	15.65	16003	16.23	16.8	17007	17.3	17.8	18.22	18555	18.6	18.5	18.65	18.74	18.8	19
Clutch /Group 5	7/XI/2017	16/XI/2017	24/XI/2017	5/XII/2017	28/XII/2017	11/I/2018	25/I/2018	7/II/2018	20/II/2018	5/III/2018	20/III/2018	2/IV/2018	16/IV/2018	30/IV/2018	15/V/2018	28/V/2018	11/VI/2018	25/VI/2018	9/VII/2018	24/VII/2018	7/VIII/2018	20/VIII/2018	3/IX/2018	17/IX/2018	1/X/2018	15/X/2018	30/X/2018	5/XI/2018	19/XI/2018	3/XII/2018	17/XII/2018	2/I/2019	14/I/2019	28/I/2019	11/II/2019	26/II/2019	11/III/2019	1/IV/2019	17/IV/2019	29/IV/2019	13/V/2019	27/V/2019	10/VI/2019	24/VI/2019
					1.83	2684	1.83	3904	6.59	4026	6.72	6.46	7.79	10.43	7.65	7.75	10.73	6.18	6.37	7.12	8.93	9.67	10.72	11.67	12.36	13.45	14.55	15.18	16.07	17.03	17.54	17.84	18.3	18.79	19.5	20.1	20.12	20.13	20.14	20.22	20.22	20.18	20.18	20.19
					1708	2562	4148	5124	7.82	8.05	5.87	7.04	6.58	7.54	6.72	8.31	7.12	6.93	7.87	8.15	9.5	10.28	11.3	12.1	12.3	13.7	14.6	15.18	16.07	17.17	17.42	17.85	18.16	18.65	19	19.64	19.66	19.87	19.9	20.17	20.18
					1708	1708	3538	5978	5.75	5124	5.3	8.93	9.8	6.06	6.2	6.3	6.19	8.06	8.13	9.2	10.49	11	11.64	12.43	12.63	13.6	14.55	15.4	16.02	16.78	17.3	17.65	18	18.56
					1586	2806	3538	5002	4.91	6.43	8.32	5.57	7.25	6.85	10.6	7.18	8.1	8.4	10.73	10.83	11.15	11.3	11.87	12.03	12.23	13.5	14.47	15
					1708	1.83	3.05	4514	5.85	4514	5.95	6.19	6.19	8.23	8.08	10.85	7.83	10.76	11
					1708	2562	3172	6954	3.96	4.88	4.32
					1.83	2806	3.05
					1.83	2928
					1739	2486	3189	5246	5813	5504	6.08	6838	7522	7822	7.85	8078	7994	8066	8.82	8825	10018	10563	11383	12058	12.38	13563	14543	15190	16053	16993	17.42	17.78	18153	18667	19.25	19.87	19.89	20	20.02	20195	20.2	20.18	20.18	20.19
[truncated: 4 more columns]
